# Supplementary material for: Self- vs proxy-reported mobility using the mobility assessment tool-short form in elderly preoperative patients
Source: Springer Nature journal article supplement (doi:10.1186/s11556-018-0194-x), 2018-04-26
Supplement: MOESM1 [file 15719678]

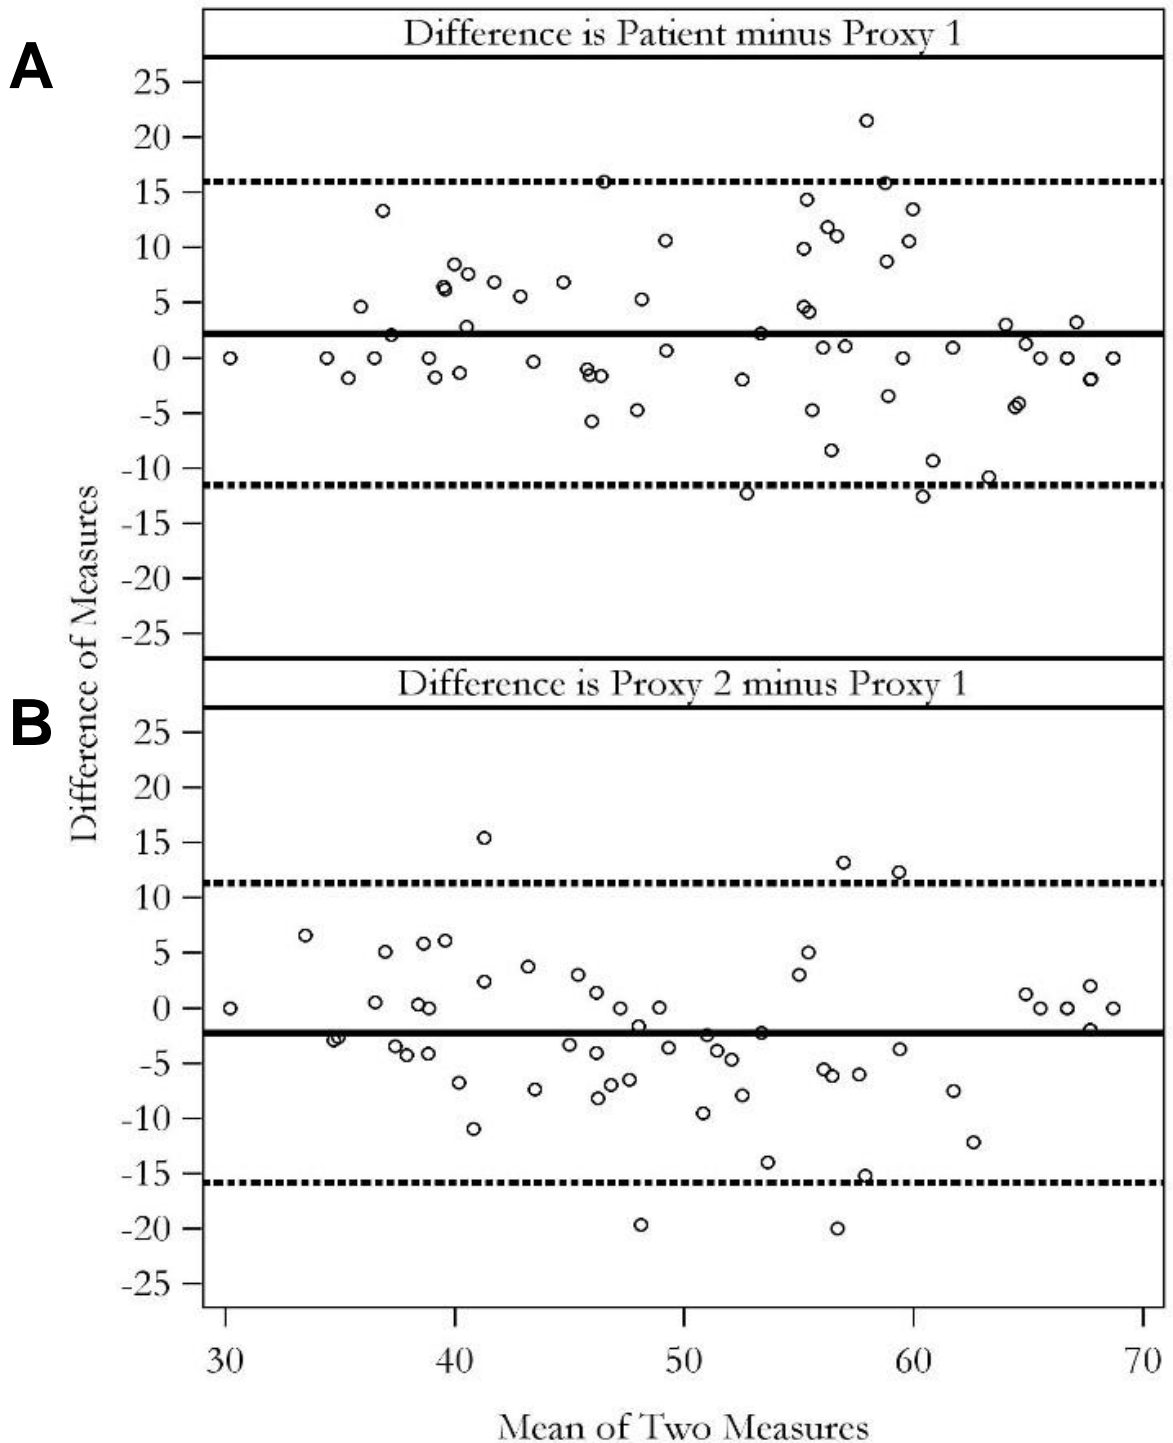

Supplemental Figure. Bland Altman comparison of MAT-sf scores between A) patient and proxy 1 and B) proxy1 and proxy 2
